# Supplementary material for: A systematic review of a novel alloplast carbonate apatite granules
Source: Frontiers journal article supplement (doi:10.3389/fdmed.2024.1418039), 2024-08-16

Diagram 1: PRISMA Flowchart for systematic review of carbonate apatite

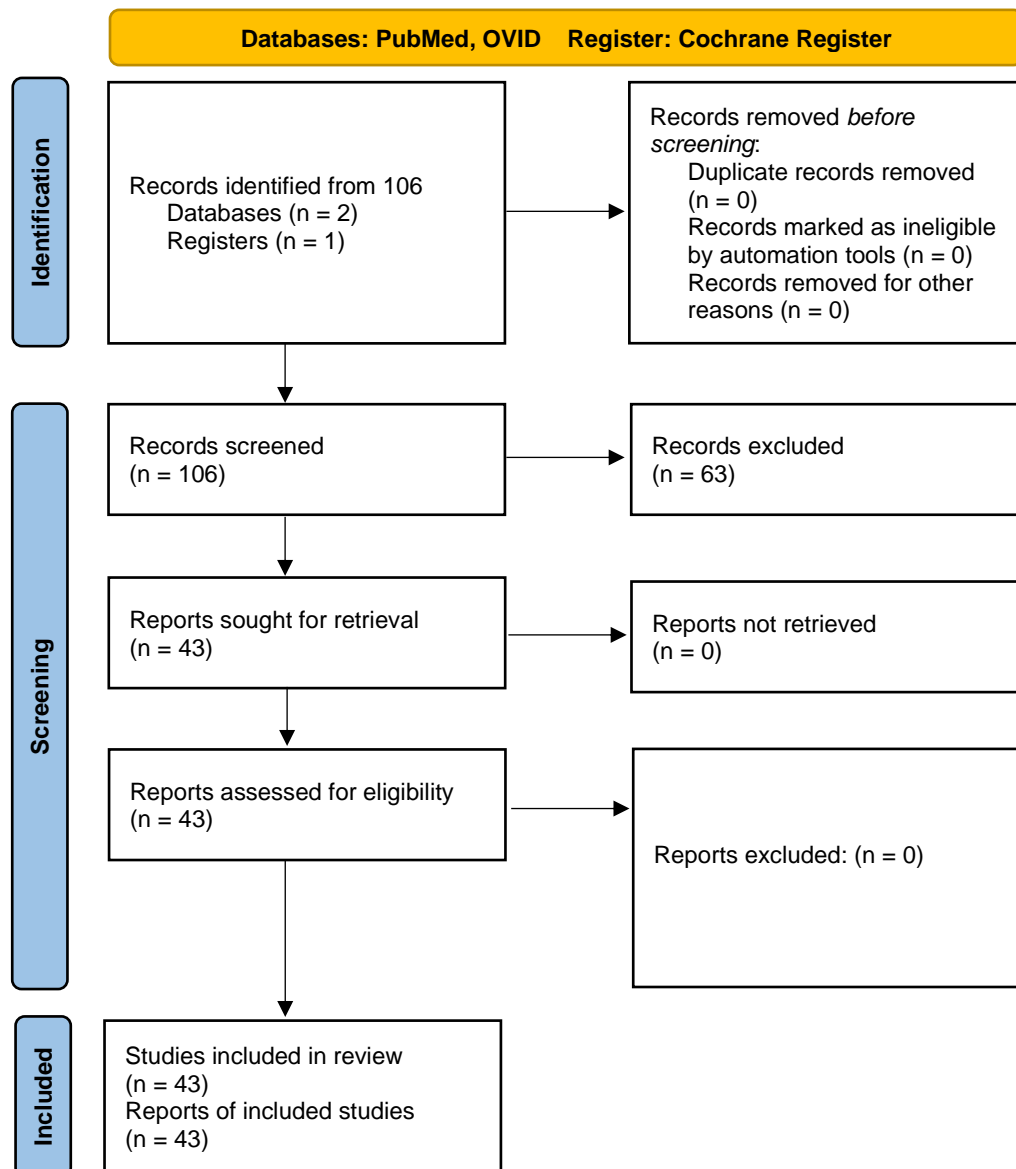

Supplement: Image_1.pdf [file Image_1.pdf]
